# Supplementary material for: Performance of Anticorrosive Paint Systems for Carbon Steel in the Antarctic Marine Environment
Source: MDPI journal article supplement (doi:10.3390/ma16165713), 2023-08-21
Supplement: s1 [file s1]

# Performance of Anticorrosive Paint Systems for Carbon Steel in the Antarctic Marine Environment

## Supplementary Materials.

Rosa Vera <sup>1,\*</sup>, Margarita Bagnara <sup>1</sup>, Rodrigo Henríquez <sup>1</sup>, Lisa Muñoz <sup>1</sup>, Paula Rojas <sup>2</sup> and Andrés Díaz-Gómez <sup>1,\*</sup>

<sup>1</sup> Instituto de Química, Facultad de Ciencias, Pontificia Universidad Católica de Valparaíso, Av. Universidad 330, Placilla (Curauma), Valparaíso 2373223, Chile; margarita.bagnara@pucv.cl (M.B.); rodrigo.henriquez@pucv.cl (R.H.); lisa.munoz@pucv.cl (L.M.)

<sup>2</sup> Facultad de Ingeniería y Ciencias, Universidad Adolfo Ibáñez, Diagonal Las Torres 2640, Santiago 7941169, Chile; paula.rojas.s@uai.cl

\* Correspondence: rosa.vera@pucv.cl (R.V.); andresdiaz.qind@gmail.com (A.D.-G.)

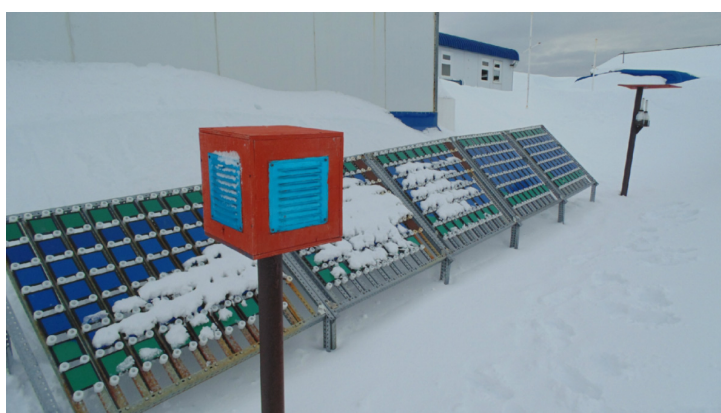

**Figure S1.** Painted and unpainted samples were exposed at the monitoring station.

**Table S1.** Summary of temperatures and precipitations, by meteorological station, 2013-2017 President Frei Antarctic base (Lat. 62 25S. Long. 5853'O. Alt. 10 msnm)

| AÑO Y MES                       | Temperatura °C  |                 |             | Agua caída (mm.) |
|---------------------------------|-----------------|-----------------|-------------|------------------|
|                                 | Máxima absoluta | Mínima absoluta | Media       |                  |
| <b>2013</b>                     | 5,5             | -19,8           | -2,6        | 302,1            |
| <b>2014</b>                     | 4,0             | -17,4           | -2,5        | 1064,4           |
| <b>2015</b>                     | 7,0             | -19,6           | -3,0        | 817,5            |
| <b>2016</b>                     | 5,8             | -19,6           | -1,8        | 1035,6           |
| <b>2017</b>                     | 6,0             | -20,1           | -2,1        | 1336,4           |
| <b>2017</b>                     |                 |                 |             |                  |
| Enero                           | 4,9             | -1,9            | 1,2         | 33,6             |
| Febrero                         | 5,2             | -4,6            | 1,6         | 68,4             |
| Marzo                           | 6,0             | -6,7            | 0,9         | 57,1             |
| Abril                           | 3,7             | -13,7           | -1,9        | 87,4             |
| Mayo                            | 4,2             | -12,1           | -2,3        | 145,5            |
| Junio                           | 1,3             | -19,4           | -5,9        | 173,3            |
| Julio                           | 1,9             | -20,1           | -4,2        | 126,8            |
| Agosto                          | 1,1             | -17,9           | -5,6        | 122,5            |
| Septiembre                      | 1,6             | -14,4           | -4,4        | 96,2             |
| Octubre                         | 2,9             | -8,7            | -3,1        | 264,2            |
| Noviembre                       | 2,3             | -8,3            | -1,6        | 94,7             |
| Diciembre                       | 5,3             | -4,7            | 0,1         | 66,7             |
| <b>Año normal<sup>(1)</sup></b> |                 |                 | <b>-2,3</b> | <b>797,2</b>     |

(1) Valores de año normal calculados para el período 1961-1990.  
Fuente: Dirección Meteorológica de Chile.

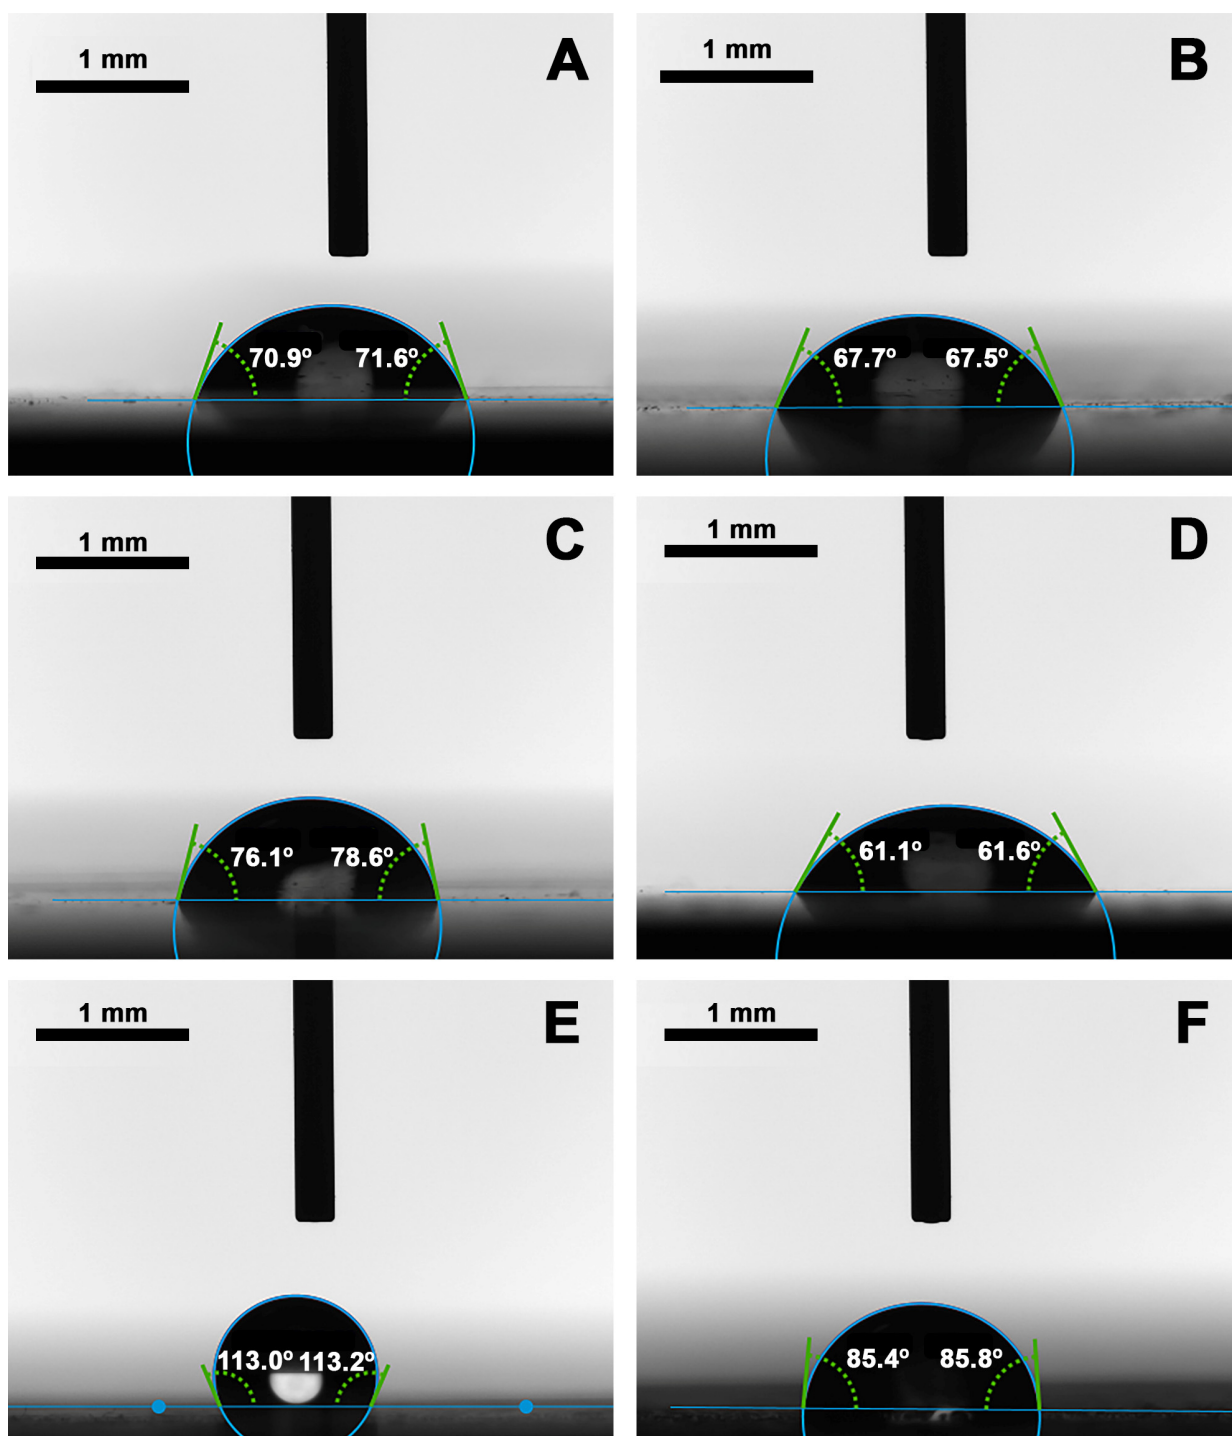

**Figure S2.** Contact angles of coating systems before and after 45 days of exposure. A) M1 before; B) M1 after; C) M2 before; D) M2 after; E) M3 before and F) M3 after.

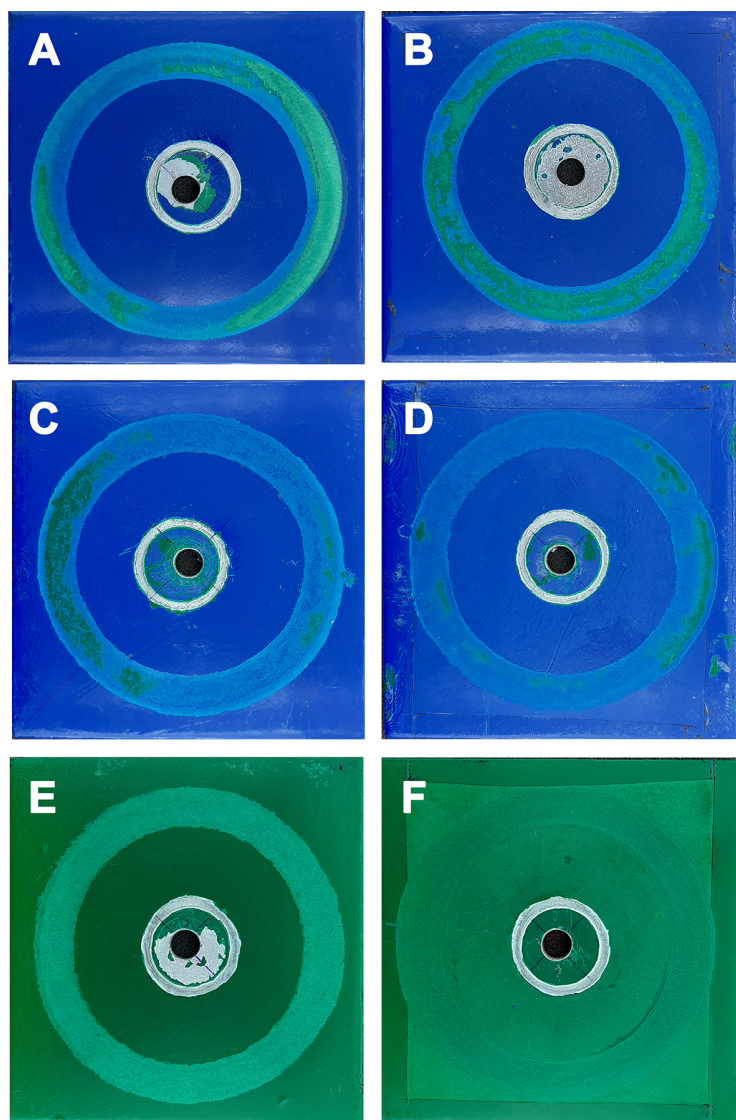

**Figure S3.** Abrasion images of the coating systems before and after 45 days of exposure. (A-B) M1, (C-D) M2, and (E-F) M3.

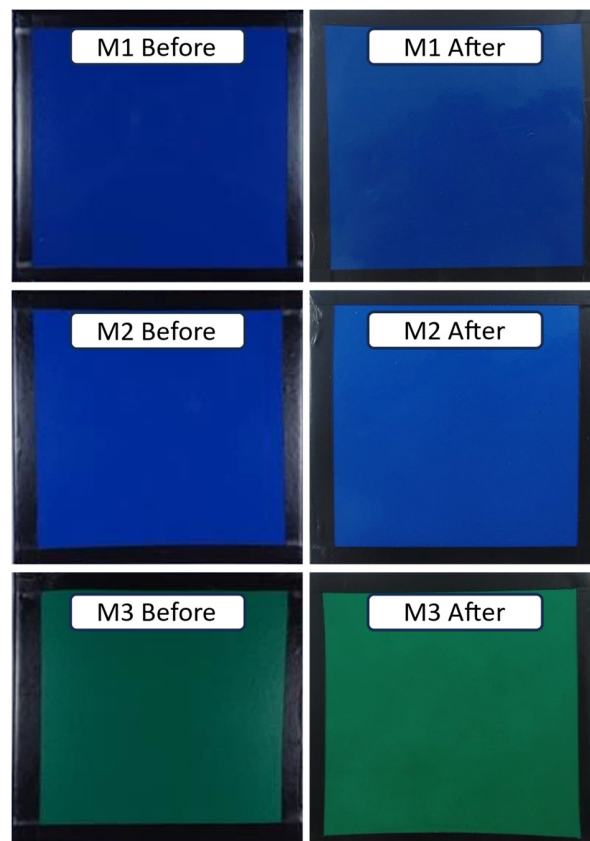

**Figure S4.** Samples of coating systems before and after exposure for 45 months in Antarctica.
